## Full Reviews

# Uraemic sarcopenia: aetiology and implications

Ibrahim H. Fahal<sup>1,2</sup>

<sup>1</sup>Department of Renal Medicine and Transplantation, The Royal London Hospital, London E1 1BB, UK and <sup>2</sup>Queens Hospital, Romford RM7 0AG, UK

Correspondence and offprint requests to: Ibrahim H. Fahal; E-mail: [ibrahim.fahal@bartshealth.nhs.uk](mailto:ibrahim.fahal@bartshealth.nhs.uk)

### ABSTRACT

The term uraemic myopathy has been used loosely to describe the skeletal muscle abnormalities in uraemic patients. However, it does not fully explain the observed abnormalities as recent research has documented a normal skeletal muscle physiology in the presence of reduced muscle force, selective structural changes and significant muscle wasting. Ageing is associated with sarcopenia (muscle wasting) and an increase in the prevalence of chronic kidney disease (CKD), which accelerates the normal physiological muscle wasting. Similar to sarcopenia, muscle wasting in uraemic patients appears to be the hallmark of the disease and its aetiology is multifactorial with hormonal, immunologic and myocellular changes, metabolic acidosis, reduced protein intake and physical inactivity. Uraemic sarcopenia presents a high probability for morbidity and mortality and consequently a high priority for muscle wasting prevention and treatment in these patients. Perhaps, the use of the term 'uraemic sarcopenia' would provide recognition by the renal community for this devastating problem. The purpose of this review is to relate the findings of the recent publications that describe abnormalities in uraemic skeletal muscle to the possible pathogenesis of muscle wasting and its consequences in patients with CKD.

**Keywords:** muscle wasting, pathophysiology, sarcopenia, uraemia

### INTRODUCTION

Skeletal muscle abnormalities in chronic kidney disease (CKD) have been described over half a century ago under the loose term uraemic myopathy [1]. The early literature reported two patterns of muscle weakness in dialysis patients; one

affecting predominately distal muscles and associated with neuropathy and the other affecting predominantly proximal muscles [2, 3]. A recent report has suggested that uraemic myopathy is common with an overall prevalence of ~50% in dialysis patients [4]. However, in general, physical examination, electromyographical studies and muscle enzymes are normal in these patients. A more recent research has documented reduced muscle force, selective structural changes and significant muscle wasting in the presence of normal skeletal muscle physiology [5, 6]. Although the term uraemic myopathy raised awareness of the problem, it did not fully explain the pathophysiology of the disease.

It is important to emphasize that both uraemia and sarcopenia are progressive diseases. Uraemia is a clinical syndrome associated with fluid, metabolic abnormalities, electrolyte and hormone imbalances, which develop in parallel with deterioration of renal function. Some of these abnormalities start earlier in the course of the uraemia and others appear late. However, by using the term uraemic sarcopenia, the progressive and cumulative effect of the CKD on the skeletal muscles is implied.

### SKELETAL MUSCLE ABNORMALITIES IN CKD

Muscle weakness, defined as a failure to generate force [7], is common in CKD patients. Several studies have confirmed reduced muscle strength in these patients [6, 8, 9]; however, only two studies analysed objectively the contractile properties of skeletal muscle of dialysis patients. Berkelhammer *et al.* [10] assessed the function of the adductor pollicis muscle in terms of force and speed of relaxation and concluded that skeletal muscle function is unaffected by uraemia, but provides a functional measure of nutritional status in chronic renal failure. In a more recent study, our group investigated the quadriceps

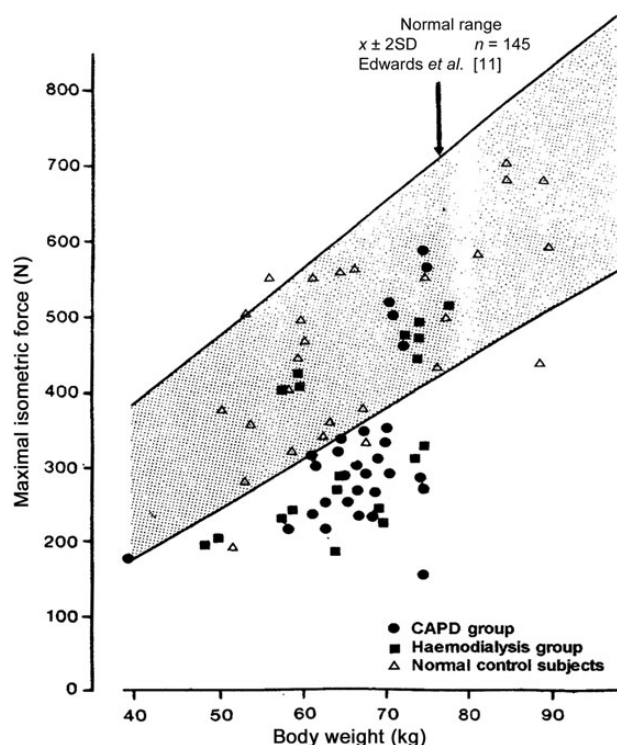

**FIGURE 1:** Reproduced with permission from Fahal *et al.* [6]. Force (N) of maximum voluntary isometric contractions of quadriceps in all dialysis patients and controls. Shaded area represents the normal range of 84 males (aged 6–63 years) and 61 females (aged 5–46 years) from Edwards *et al.* [11].

femoris and adductor pollicis muscles force and contractile properties in a group of dialysis patients. Objective measurement of quadriceps force revealed unequivocal force reduction in 71% of the patients (Figure 1), particularly, in malnourished patients. We also demonstrated no evidence of impaired neuromuscular transmission or impaired excitation–contraction coupling as demonstrated by percutaneous electrical stimulation studies; however, skeletal muscle relaxation characteristics were slowed in all patients particularly in the malnourished group [6].

## MUSCLE FATIGUE

Fatigue, defined as the failure to sustain force or power output [7], is often reported by patients on dialysis. Two types of fatigue are recognized based on an anatomical subdivision, central and peripheral [7, 11].

In patients with CKD, the mechanisms responsible for the perceived fatigue remain poorly understood. In theory, hormonal imbalances [12], malnutrition [10], ATP and glycogen depletion [13], impaired oxygen transport due to anaemia, metabolic acidosis, alterations in electrolytes [14], altered life style [15] and muscle wasting and weakness due to muscle fibres atrophy [16] could all lead to peripheral fatigue development during exercise. However, there is little objective evidence of impairment in peripheral muscle function itself that contributes to fatigue in these patients. Many studies have

examined exercise capacity relying on measures of  $\text{VO}_2$  max [17, 18] or voluntary contractions lifting loads. Few studies have examined the electrophysiological response of muscle during fatiguing activity. Berkelhammer *et al.* [10] examined the frequency, force and relaxation characteristics of adductor pollicis on the stimulation of the ulnar nerve in patients with chronic renal failure and were able to show no abnormality, although the 10–100 Hz force ratio was increased and relaxation characteristics slower in a group of malnourished patients. In a more recent study, our group reported that the fatigability of dialysis patients muscle is the same as in normal subjects. Fatigue of adductor pollicis during electrically evoked contractions was similarly demonstrated in both patient and control groups, the changes in physiological parameters measured (force, excitation and relaxation characteristics) were similar in both the groups [5] and frequency dependence of force generation, 20:50 Hz tetanic force ratio and relaxation characteristics were not significantly different between the patient and control groups. However, subdividing the patients by nutritional status using the Subjective Global Assessment questionnaire revealed greater fatigue at 10 Hz in the malnourished compared with the well-nourished group [5]. Although these findings have been attributed to ‘malnutrition’, more recent evidence documented that muscle abnormalities in uraemia can occur despite adequate nutritional intake and feeding does not improve the abnormalities. Instead, there are complex mechanisms that stimulate loss of skeletal muscle which will be discussed in this review.

## MUSCLE BIOPSY STUDIES

The earliest histological studies of the skeletal muscles of haemodialysis patients were at variance reporting electromyographical and morphological abnormalities with or without neuropathic changes [16, 19]. However, there is firm evidence that the most common abnormalities in uraemia are Type II fibre atrophy, small cross-sectional area (CSA) and type grouping [20, 21]. Recently, we found Type II fibre CSA ( $\mu\text{m}^2$ ) of uraemic patients to be smaller than that of healthy controls ( $3883 \pm 557$  versus  $5213 \pm 1288$ ) and also found a suggestion that Type I fibres CSA ( $\mu\text{m}^2$ ) are smaller ( $4011 \pm 458$  versus  $4627 \pm 1112$ ) in the uraemic patients compared with the healthy controls. Considering the subtypes of Type II fibres, we found greater atrophy of Type IIB fibres (Type X using the myosin heavy chain-based classification) than of Type IIA fibres ( $2335 \pm 473$  versus  $3533 \pm 956$ ) and a significantly smaller Type IIB fibre area ( $2335 \pm 473$  versus  $4346 \pm 1496$ ) in the malnourished uraemic patients compared with the well-nourished patients [5].

Electron microscopy studies showed no significant structural abnormalities in the mitochondria of dialysis patients. However, the glycogen content was increased possibly reflecting reduced physical activity, and lipofuscin increased possibly due to muscle atrophy [19, 22]. However, the mitochondrial enzymes (cytochrome *c* oxidase, succinate reduction of cytochrome, palmitate oxidation and citrate synthase) were low in the quadriceps muscle biopsy of dialysis patients compared

with normal controls and chronic fatigue patients [5]. A more recent study using muscle biopsies of patients with CKD has also reported a decrease in muscle mitochondrial oxidative enzymes (muscle cytochrome *c* oxidase activity and citrate synthase) and a decrease in the synthesis of muscle contractile mixed muscle proteins, myosin heavy chain and mitochondrial proteins. The synthetic rates of muscle proteins and activity of mitochondrial enzymes were negatively correlated to the severity of renal failure [23]. In another study, the same group demonstrated an age-related selective decline in the synthesis rate of the muscle proteins myosin heavy chain [24] and a similar decline in the rate of muscle mitochondrial protein synthesis with ageing, which was associated with a decline in skeletal muscle oxidative capacity and mitochondrial function [25]. The mechanism by which uraemia contributes to the decrease in the synthetic rate of several muscle proteins is complex and will be discussed in the following sections.

## MUSCLE PROTEIN WASTING

Muscle wasting is common [26] and is progressive in patients with CKD [27]. The decrease in muscle mass involves both a decrease in muscle fibre size (atrophy) and number (hypoplasia). This is attributed to muscle protein wasting and its multifactorial aetiology with hormonal, immunologic and myocellular changes, inflammation, metabolic acidosis, reduced protein intake, physical inactivity, excess angiotensin II, abnormalities in insulin/insulin-like growth factor I (IGF-I), myostatin expression and reduction in satellite cells function (Figure 2). Most of these stimulate the ATP-dependent ubiquitin-proteasome system (UPS), which has been identified as the most important pathway for muscle wasting. The potential intracellular signalling processes involved in uraemic muscle wasting are depicted in Figure 3 and although certain regulatory pathways are emphasized other mechanisms are probably involved as well.

Similar to sarcopenia, the loss of muscle mass (wasting) in CKD patients appears to be multifactorial and the different mechanisms contributing to uraemic sarcopenia are reviewed below.

## MYOGENIC PROGENITOR AND SATELLITE CELLS

Satellite cells are skeletal muscle-specific stem cells known for their robust myogenic potential and self-renewal properties. They are located between the basal lamina and sarcolemma of muscle fibres [28, 29]. After muscle injury, satellite cells are activated and express the MyoD and myogenin transcription factors leading to proliferation and formation of myoblasts, and then differentiate, forming new muscle fibres to repair injured muscle [30]. Transplantation of a single muscle fibre, with resident satellite cells intact, is sufficient not only to support significant regeneration of the host limb muscle but also to replenish the satellite cell pool [31].

Wang *et al.* [32] reported decreased MyoD protein and myogenin expression with impaired regeneration of injured muscle in mice with CKD. These abnormalities suggested that satellite cells function is impaired in CKD; however, the abnormalities were corrected in the muscle by resistance exercise. Recently, the same group reported a new mechanism for CKD-induced muscle atrophy linking impaired satellite cell function to decreased IGF-1R signalling leading to reducing satellite cell proliferation and differentiation [33].

## INFLAMMATION

Low-grade inflammation is common in CKD even in early stages as evident from increased circulating levels of inflammatory markers (CRP and interleukin-6—‘IL-6’, and tumour necrosis factor- $\alpha$ —‘TNF- $\alpha$ ’). Recent evidence suggests that inflammation is an important cause of muscle wasting in patients with CKD [34–36]. Further research has shown that muscle mass in dialysis patients is inversely correlated to circulating levels of IL-6 and CRP [37]. There are several mechanisms for the role of inflammation in muscle wasting. TNF- $\alpha$  enhances muscle wasting via induction of the NF $\kappa$ B pathway [38] and treatment with TNF- $\alpha$  attenuates insulin-stimulated protein synthesis [39] and inhibits myocyte differentiation through NF $\kappa$ B activation, causing muscle wasting [40]. Zhang *et al.* [41] uncovered a new role for an acute phase reactant protein. Infusion of angiotensin II increases hepatic production of IL-6 and SAA acting synergistically to impair insulin/IGF-1 signalling, thus promoting muscle proteolysis. Cheung *et al.* showed that infusion of cytokines (TNF- $\alpha$ , IL-6, IL-1 $\beta$ , interferon- $\gamma$ ) enhanced muscle protein degradation via the NF $\kappa$ B pathway, whereas neutralization of these factors by genetic or pharmacological approaches attenuates muscle wasting [42]. Inflammation also leads to muscle wasting through the activation of the UPS. This system is thought to be the major cause of muscle wasting in CKD and will be discussed in the following section.

## ATP-DEPENDENT UPS

Regulation of muscle protein balance in uraemia is complex and involves several mechanisms [42]. The ATP-dependent ubiquitin-proteasome proteolysis is singled out as the major cause of increased skeletal muscle degradation in CKD [43]. Inflammation and metabolic acidosis play a major role in activating the UPS. Inflammation activates the UPS leading to cleavage of a characteristic 14 kDa actin fragment in the soluble fragment of muscle which is the hallmark of increased muscle proteolysis in CKD [44]. Metabolic acidosis, which is common among CKD patients, can similarly induce UPS up-regulation and increased branch amino acid oxidation in skeletal muscle [45]. Boivin *et al.* observed increased caspase-3 activity in the skeletal muscle of dialysis patients leading to increased generation of 14 kDa actin as well as ubiquitinated C-terminal actin fragment. The same group also noted that



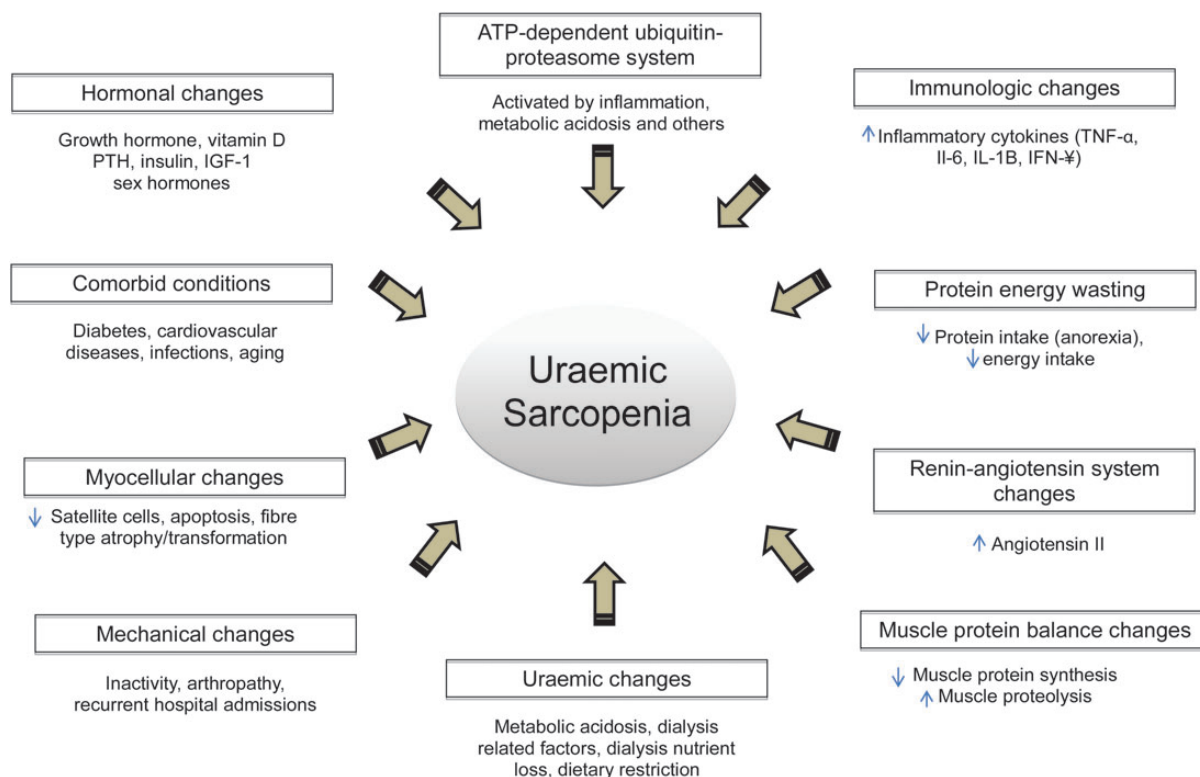

FIGURE 2: Possible aetiology of uraemic sarcopenia.

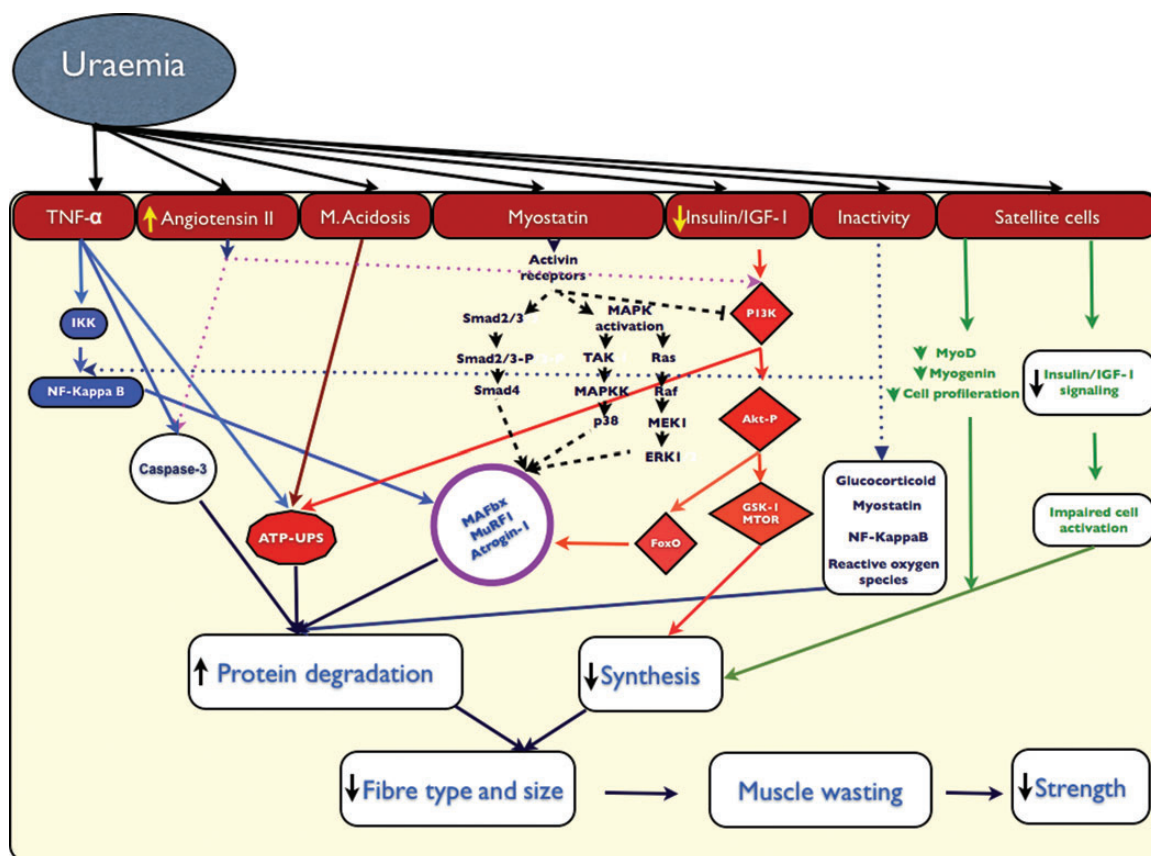

FIGURE 3: Potential intracellular signalling processes involved in uraemic muscle wasting (sarcopenia). Although certain regulatory pathways are emphasized other mechanisms are probably involved as well.

the skeletal muscle of dialysis patients exhibited augmented apoptosis [46].

## METABOLIC ACIDOSIS

Metabolic acidosis is prevalent among CKD patients, particularly those in stage 4 [47]. It promotes muscle protein wasting and protein-energy wasting (PEW) [48] by increasing protein degradation [49] and reducing protein synthesis [50]. As a result, maintenance of muscle mass is impaired in CKD patients with altered protein turnover rates, Type II fibre atrophy manifested clinically in muscle wasting [51]. Muscle protein degradation and excessive oxidation of branched-chain amino acids in skeletal muscle [52] are achieved through up-regulation of the ubiquitin-proteasome pathway [42].

Stein *et al.* [53] randomly assigned 200 peritoneal dialysis patients with metabolic acidosis to treatment with a dialysate solution of 35 mmol/L lactate or to a dialysate of 40 mmol/L lactate. After 1 year, both the groups of patients had higher serum bicarbonate, had gained weight and had an increase in mid-arm muscle circumference compatible with an increase in muscle mass. Pickering *et al.* [54] found that a small increase of the serum bicarbonate level in CAPD patients leads to a down-regulation of proteolysis via the UPS in muscle and also found an increase in plasma branched-chain amino acids consistent with a decrease in their degradation. A recent study from our group using sodium bicarbonate supplementation in patients with pre-dialysis CKD reported a slower decline in renal function as well as increase in dietary protein intake and reduction in normalized protein nitrogen appearance, reflecting a lower protein breakdown leading to an increment in the lean body mass as assessed by mid-arm muscle circumference [55]. Other studies of bicarbonate supplementation were also associated with the reduction of protein degradation in both peritoneal [50, 56] and haemodialysis [57] patients as well as in elderly pre- end-stage renal disease (ESRD) patients [58]. Correction of acidosis may, therefore, help to preserve muscle mass and improve the health of patients with CKD.

## CHANGES IN VITAMIN D

Vitamin D status is positively associated with muscle strength [59], physical performance [60] and inversely associated with the risk of falling [61] and it also plays an important role in other metabolic pathways, such as immune regulation, inflammation, insulin resistance, hypertension, thrombosis and the proliferation and differentiation of several cells including skeletal muscle [62]. Vitamin D supplementation has shown to improve tests of muscle function [63], reduce falls [64], and possibly impact on muscle fibre composition and morphology in vitamin D-deficient older adults [65]. In addition, the identification of the vitamin D receptor on muscle cells [66] has provided further support for a direct effect of vitamin D on muscle tissue.

As in individuals with normal renal function and vitamin D deficiency [67], patients with CKD have prolongation of the

relaxation phases of muscle contraction, independent of serum calcium, parathyroid hormone or serum phosphorus levels [6, 9]. These observations suggested a possible role for vitamin D in the myopathy of CKD and early clinical descriptions recognized a potential association between vitamin D and muscle in CKD patients [68]. In addition, muscle biopsies in adults with profound vitamin D deficiency have shown predominantly Type II fibre atrophy and enlarged interfibrillar spaces and infiltration of fat, fibrosis and glycogen granules [69]. These morphological features are not dissimilar from those found in patients with CKD with Type II muscle fibre atrophy, lipofuscin and glycogen deposition [2, 5].

## CHANGES IN THE ANGIOTENSIN II

The reninangiotensin system is activated in many catabolic conditions including CKD leading to down-regulation of phospho-Akt and activation of caspase-3 in skeletal muscle, resulting in actin cleavage, an important component of muscle proteolysis and to increased apoptosis [70]. Brink *et al.* [71] demonstrated that infusion of angiotensin II in the rat produced increased muscle proteolysis and decreased circulating and skeletal muscle IGF-1 leading to a marked reduction in body weight. While the administration of losartan, an angiotensin II Type 1 receptor blocker, inhibits canonical transforming growth factor- $\beta$  (TGF- $\beta$ ) signalling activity and promotes muscle remodelling in mouse models of Marfan syndrome and dystrophin-deficient Duchenne muscular dystrophy [72]. Increased TGF- $\beta$  signalling is among the mechanisms of the skeletal muscle wasting [73]. It is a known inhibitor of skeletal muscle regeneration and remodelling, impaired myocyte differentiation [74], inhibits satellite cell activation, [73, 75] and leads to the formation of fibrotic tissue in response to skeletal muscle injury [75]. Furthermore, treatment with losartan after infliction of muscle injury also improved regeneration in normal adult murine skeletal muscle by reducing fibrotic tissue formation [76]. Another study demonstrated that losartan facilitated the remodelling of sarcomeric skeletal muscle after injury and protected it from disuse atrophy during immobilization in an ageing mouse model [77].

## CHANGES IN APPETITE

Anorexia, defined as the loss of desire for food, is common and complex in CKD. Disturbances in appetite-regulating hormones, decreased ability to distinguish flavours, altered taste, uraemia-related gastrointestinal symptoms [78], depression [79], haemodynamic instability as a result of exposure to anti-hypertensive medications or haemodialysis, and a sensation of fullness during peritoneal dialysis are among the causes cited in the literature.

Disturbances in appetite-regulating hormones such as leptin, a potent appetite inhibitor [80], and ghrelin, an appetite stimulant [81], have been reported in CKD. Leptin, a potential mediator of inflammation-induced anorexia [82] is elevated in

CKD patients [83] due to impaired renal clearance [84]. Reports on the total circulating ghrelin levels in CKD are inconsistent [85, 86]. However, recent studies have shown that only plasma des-acyl ghrelin levels were elevated in CKD patients and suggested that elevated des-acyl ghrelin levels could be involved in the anorexia of CKD patients [87].

## GENDER AND CHANGES IN SEX HORMONES

Experimental and clinical studies have shown gender differences in disease presentation and severity of symptoms. The influence of sex hormones on muscle function has been previously investigated. Testosterone, an anabolic steroid, administration is associated with an increase in muscle mass and strength [88], while testosterone deficiency causes reduced muscle mass. In men with CKD, testosterone deficiency is common [89]. It is due to reduce prolactin clearance [90] and uraemic inhibition of luteinizing hormone signalling at the level of the Leydig cells [91].

Female with CKD are usually oligomenorrhoeic and oestrogen deficient at an early stage. Oestrogen is responsible for changes in strength and investigations of force production during the menstrual cycle in healthy women reported greater force generation of the adductor pollicis [92] and the quadriceps femoris muscle group [93] around ovulation when oestrogen levels are at their height. Phillips *et al.* [94] in another study found that muscle weakness in women occurs at an earlier age than in men, but strength is preserved by hormone replacement therapy.

Male gender is associated with a more rapid rate of progression and a worse renal outcome in patients with chronic renal disease [95, 96]. Inflammation-induced anorexia is more severe among male rats, while progesterone injections decreased the severity of anorexia among female rats [97]. Nephrectomized male rats develop anaemia and malnutrition, whereas matched female rats are not significantly affected [98]. Moreover, a recent study suggests that sex may determine the severity of symptoms, such as handgrip strength, among patients who report a poor appetite.

All of these observations suggest that gender and sex hormones may contribute to the different symptomatology associated with poor appetite in men and women and support the hypothesis that uraemic men may be more susceptible than women to inflammation-induced anorexia [99] and consequently skeletal muscle abnormalities.

## CHANGES IN GROWTH HORMONE

CKD is associated with growth hormone (GH) resistance [100] and, in skeletal muscle, it is a potential cause of increased protein catabolism and wasting. Several mechanisms for GH resistance have been reported in CKD [101, 102]. The resistance of the anabolic hormone IGF-1 to protein turnover in skeletal muscles in CKD has been proposed as one of the mechanisms leading to muscle wasting [103]. IGF bioactivity has been found to be reduced in end-stage renal failure leading

to the reduction in free IGF-1 in proportion to renal failure [104].

Studies have shown that recombinant human growth hormone (rhGH) administered at pharmacologic doses induces a net anabolic action and also improves food utilization in uraemic animal models [105] and in patients with advanced CKD [106]. Anabolic effects of rhGH in haemodialysis patients have also been noted on the muscle compartment, with increases of up to 3–4 kg in lean body mass with short and mid-term administration [107]. rhGH improves whole-body protein homeostasis. It significantly reduces essential amino acid and muscle loss in chronic haemodialysis patients [108]. A 6-week administration of 50 µg rhGH in cachectic haemodialysis patients has significantly improved the net muscle protein balance [109] and increased lean body mass and quality of life with no significant side effects [110].

## CHANGES IN INSULIN

CKD is associated with insulin resistance from an early stage [111] and even when the GFR is normal [112, 113]. Insulin resistance correlated linearly with the decline in renal function [114] and is established in almost all patients at ESRD [115]. Several explanations for the presence of insulin resistance in CKD patients have been proposed, such as deficiency of vitamin D, anaemia or putative uraemic toxins [116–118].

Insulin resistance in CKD patients has been related to the development of uraemic myopathy and diabetic dialysis patients have a higher prevalence and more severe forms of uraemic myopathy [119]. This is because insulin resistance decreases the use of glucose as an energy source [115], increases hepatic gluconeogenesis not normally suppressible following insulin release, reduces hepatic and/or skeletal muscle glucose uptake and impairs intracellular glucose metabolism [116]. It is strongly associated with increased muscle protein breakdown, primarily mediated by the ubiquitin-proteasome pathway [44, 120]. Recently, the link between impaired insulin/IGF-I signalling in muscle leading to a decrease in P-Akt and muscle wasting was unrevealed under several conditions, including excess angiotensin II, inflammation and CKD with acidosis [45, 121] and results in activating two pathways causing muscle protein wasting. First, there is activation of caspase-3 that breaks down the complex protein structure of muscle. Second, a low P-Akt decreases phosphorylation of the forkhead transcription factor, which permits its translocation into the nucleus, where it stimulates the expression of atrogin-1/muscle atrophy F-box (MAFbx) and muscle ring finger 1 (MuRF1) [121]. It is important to emphasize that sarcopenia is a progressive disease and the effects of insulin resistance is a cumulative effect starting early in the course of the disease.

## PROTEIN-ENERGY WASTING

PEW is not uncommon in patients with CKD. It is characterized by reduced circulating body protein, reduced body mass and reduced muscle mass [58]. The aetiology of PEW in CKD

**Table 1. Aetiology of muscle wasting in sarcopenia and CKD**

| Sarcopenia                                                                                                                                                                                                                                                                                                                         | CKD                                                                                                                                                                                                                                                                                                                                                                                                                                         |
|------------------------------------------------------------------------------------------------------------------------------------------------------------------------------------------------------------------------------------------------------------------------------------------------------------------------------------|---------------------------------------------------------------------------------------------------------------------------------------------------------------------------------------------------------------------------------------------------------------------------------------------------------------------------------------------------------------------------------------------------------------------------------------------|
| <ul style="list-style-type: none"> <li>• Increase in proinflammatory cytokines</li> <li>• Decreased protein intake</li> <li>• Decline in exercise</li> <li>• Decrease sex hormones</li> <li>• Decreased Growth hormone</li> <li>• Decreased insulin</li> <li>• Decrease vitamin D</li> <li>• Decline in satellite cells</li> </ul> | <ul style="list-style-type: none"> <li>• Increase in proinflammatory cytokines</li> <li>• Muscle protein imbalance</li> <li>• Inactivity</li> <li>• Decrease sex hormones</li> <li>• Growth hormone resistance</li> <li>• Insulin resistance</li> <li>• Vitamin D abnormalities</li> <li>• Decline in satellite cells</li> <li>• Metabolic acidosis</li> <li>• Angiotensin II</li> <li>• PEW</li> <li>• Myostatin overexpression</li> </ul> |

is complex and includes inflammation, transient intercurrent catabolic illnesses [122], nutrient losses into dialysate [123], metabolic acidosis [124], resistance to insulin [125], GH [126] and IGF-I [127], hyperglucagonemia [128], hyperparathyroidism [129] and loss of blood into the haemodialyser, into faeces or by blood drawing [130].

### PHYSICAL INACTIVITY AND EXERCISE

The benefits of exercise in the general population are well documented [131–134] as is the reduced physical activity in dialysis and CKD patients [135, 136]. Recent research suggested that CKD can induce muscle protein wasting and muscle atrophy due to complex mechanisms including physical inactivity and deconditioning [137]. Resistance training in animal models has been shown to reduce muscle protein catabolism and improves the muscle wasting associated with CKD, both by increasing the muscle size and strength [138–140] and by reducing low-grade inflammation and increasing IGF-I and IGF-II [141, 142].

### CHANGES IN MYOSTATIN AND FOLLISTATIN

Myostatin and follistatin are members of the TGF- $\beta$  family. Myostatin levels are overexpressed in uraemic cachexia and negatively impact on skeletal muscle mass and growth leading to muscle atrophy through a complex signalling mechanism which involves the activation of the canonical pathway of Smad, mitogen-activated protein kinase pathway and inhibition of Akt signalling [32, 143]. Strategies to correct uraemic sarcopenia may be mediated, at least, in part, by inhibition of myostatin expression [144].

Follistatin, a regulatory glycoprotein, previously known as FSH-suppressing protein is a potent myostatin antagonist and experimental evidence has shown that overexpression of follistatin induces a dramatic increase in muscle mass [145, 146]. However, the mechanisms involved in the follistatin effect are relatively unknown and Gilson *et al.* [147] have recently shown that satellite cell proliferation significantly contributes to the follistatin-induced muscle growth and probably

increased protein synthesis. The same authors also reported that activin is as well a crucial player in the regulation of muscle mass.

In a recent publication, Miyamoto *et al.* [148] reported that follistatin levels were not affected in patients with CKD, except in wasted and inflamed patients when it is negatively associated with muscle strength and bone mineral density. The authors speculated in line with the above-reported experimental evidence that follistatin is activated to counter regulate the effects of myostatin and activin in uraemia. Strategies to increase the skeletal muscle size and strength through myostatin inhibition by follistatin would represent a potential therapeutic approach to muscle atrophy in uraemia and other conditions.

### IMPLICATIONS OF URAEMIC SARCOPENIA

Sarcopenia is a powerful predictor of morbidity and mortality in dialysis patients. Several studies suggested that a larger body size in maintenance dialysis patients has survival advantages [148–155] and poor survival in dialysis patients with a low body size [156, 157] and reduced serum creatinine [158]. However this phenomenon of the reverse epidemiology of obesity is not unique to the dialysis population. Patients with chronic heart failure [159], elderly patients [160] and patients with malignancy [161] or AIDS [162] also exhibit a risk factor reversal and all share a degree of muscle wasting.

Several studies investigated whether lean body mass or fat mass confers this survival advantage. Kalantar-Zadeh *et al.* [163] reported that low baseline body fat percentage and fat loss over time are independently associated with higher mortality in maintenance dialysis patients even after adjustment for demographics and surrogates of muscle mass and inflammation. Noori *et al.* [164] also reported that higher fat mass in both sexes and higher lean body mass in women appear to be protective, and in a different study the same group reported that the mid-arm muscle circumference is a surrogate of larger lean body mass and an independent predictor of better mental health and greater survival in dialysis patients [165]. Other recent studies have suggested that higher lean body mass, but not fat mass, is associated with greater survival in CKD patients [166].

Muscle wasting is a devastating complication because it leads to decreased quality of life, increases cardiovascular complications and increases morbidity and mortality associated with CKD [167]. Importantly, low exercise capacity as a consequence of muscle wasting is also a powerful, independent predictor of mortality in patients with CKD [168].

### CONCLUSIONS

As in sarcopenia, uraemic muscle wasting is complex (Figure 2), progressive and its pathogenesis is similar (Table 1). Older persons are particularly susceptible to renal failure and this accelerates the physiological muscle wasting in this patient group. This devastating complication not only promotes a sedentary lifestyle and decreased quality of living,



but also increases cardiovascular complications, morbidity and mortality.

Despite this excessive risk of muscle wasting, CKD patients are treated with much less intensity, suggesting that clinicians have concentrated on complications in patients with ESRD, when pathology is already too advanced or irreversible. Considering the impact of muscle wasting on the well-being of patients with CKD and the healthcare system in general, it makes logical sense to study patients with mild-to-moderate renal impairment at a stage when the skeletal muscle complications may still be reversible and to identify and introduce therapeutic strategies to maintain skeletal muscle homeostasis and repair at a time which may lead to a meaningful preventive response. Perhaps, the use of the term uraemic sarcopenia would provide recognition by the renal community for this devastating problem.

## CONFLICT OF INTEREST STATEMENT

None declared.

## REFERENCES

- Serratrice G, Toga M, Roux H *et al.* Neuropathies, myopathies and neuromyopathies in chronic uremic patients. *Presse Med* 1967; 75: 1835–1838
- Floyd M, Ayyar DR, Barwick DD *et al.* Myopathy in chronic renal failure. *Q J Med* 1974; 43: 509–524
- Isaacs H. Electromyographic study of muscular weakness in chronic renal failure. *S Afr Med J* 1969; 43: 683–688
- Clyne N. Physical working capacity in uremic patients. *Scand J Urol Nephrol* 1996; 30: 247–252
- Fahal IH. An objective analysis of muscle weakness and fatigue in renal dialysis patients. MD thesis. University of Liverpool, UK 1997, pp. 99–127
- Fahal IH, Bell GM, Bone JM *et al.* Physiological abnormalities of skeletal muscle in dialysis patients. *Nephrol Dial Transplant* 1997; 12: 119–127
- Edwards RHT. Human muscle function and fatigue. In: Ciba Foundation (editors), *Human Muscle Fatigue: Physiological Mechanisms*, Ciba Foundation Symposium, Vol. 82. London: Pitman Medical, 1981, pp. 1–18
- Kettner-Melsheimer A, Weiss M, Huber W. Physical work capacity in chronic renal disease. *Int J Artif Organs* 1987; 10: 23
- Fahal IH, Ahmad R, Edwards RHT. Muscle weakness in continuous ambulatory peritoneal dialysis patients. *Perit Dial Int*. 1996; 16: S419–S423
- Berkelhammer CH, Lawrence AL, Jeejeebhoy KN *et al.* Skeletal muscle function in chronic renal failure: an index of nutritional status. *Am J Clin Nutr* 1985; 42: 845–854
- Edwards RHT, Young A, Hosking GP *et al.* Human skeletal muscle function: description of tests and normal values. *Clin Sci Mol Med* 1977; 52: 283–290
- Brautbar N. Skeletal myopathy in uremia: abnormal energy metabolism. *Kidney Int* 1983; 24: S81–S86
- Durozard D, Pimmel P, Baretto S *et al.* <sup>31</sup>P NMR spectroscopy investigation of muscle metabolism in hemodialysis patients. *Kidney Int* 1993; 43: 885–892
- Booth FW, Thomason DB. Molecular and cellular adaptation of muscle in response to exercise: perspectives of various models. *Physiol Rev* 1991; 71: 541–585
- Gutman RA, Stead WW, Robinson RR. Physical activity and employment status of patients on maintenance dialysis. *N Engl J Med* 1981; 304: 309–313
- Ahonen RE. Light microscopic study of striated muscle in uraemia. *Acta Neuropathol (Berl)* 1980; 49: 51–55
- Shalom R, Blumenthal JA, Williams RS. Feasibility and benefits of exercise training in patients on maintenance dialysis. *Kidney Int* 1984; 25: 958–963
- Diesel W, Noakes TD, Swanepoel C *et al.* Isokinetic muscle strength predicts maximum exercise tolerance in renal patients on chronic hemodialysis. *Am J Kidney Dis* 1990; 16: 109–114
- Floyd M, Ayyar DR, Hudgson P *et al.* Myopathy in chronic renal failure. *Proc Eur Dial Transplant Assoc* 1969; 6: 203–214
- Diesel W, Emms M, Knight BK *et al.* Morphologic features of the myopathy associated with chronic renal failure. *Am J Kidney Dis* 1993; 22: 677–684
- Sakkas GK, Ball D, Mercer TH *et al.* Atrophy of non-locomotor muscle in patients with end-stage renal failure. *Nephrol Dial Transplant* 2003; 18: 2074–2081
- Savazzi GM, Govoni E, Bragaglia MM *et al.* Ultrastructural findings of uraemic muscular damage: functional implications. *Proc Eur Dial Transplant Assoc* 1983; 19: 258–265
- Adey D, Kumar R, McCarthy JT *et al.* Reduced synthesis of muscle proteins in chronic renal failure. *Am J Physiol Endocrinol Metab* 2000; 278: E219–E225
- Balogopal P, Rooyackers OE, Adey DB *et al.* Effects of aging on in vivo synthesis of skeletal muscle myosin heavy-chain and sarcoplasmic protein in humans. *Am J Physiol Endocrinol Metab* 1997; 273: E790–E800
- Rooyackers OE, Adey DB, Ades PA *et al.* Effect of age on in vivo rates of mitochondrial protein synthesis in human skeletal muscle. *Proc Natl Acad Sci USA* 1996; 93: 15364–15369
- Workeneh BT, Mitch WE. Review of muscle wasting associated with chronic kidney disease. *Am J Clin Nutr* 2010; 91: 1128S–1132S
- Qureshi AR, Alvestrand A, Danielsson A *et al.* Factors predicting malnutrition in hemodialysis patients: a cross-sectional study. *Kidney Int* 1998; 53: 773–782
- Mauro A. Satellite cell of skeletal muscle fibers. *J Biophys Biochem Cytol* 1961; 9: 493–495
- Sacco A, Doyonnas R, Kraft P *et al.* Selfrenewal and expansion of single transplanted muscle stem cells. *Nature* 2008; 456: 502–506
- Zammit PS, Partridge TA, Yablonka-Reuveni Z. The skeletal muscle satellite cell: the stem cell that came in from the cold. *J Histochem Cytochem* 2006; 54: 1177–1191
- Collins CA, Olsen I, Zammit PS *et al.* Stem cell function, self-renewal, and behavioral heterogeneity of cells from the adult muscle satellite cell niche. *Cell* 2005; 122: 289–301
- Wang XH, Du J, Klein JD *et al.* Exercise ameliorates chronic kidney disease-induced defects in muscle protein metabolism and progenitor cell function. *Kidney Int* 2009; 76: 751–759
- Zhang L, Wang XH, Wang H *et al.* Satellite cell dysfunction and impaired IGF-1 signaling cause CKD-induced muscle atrophy. *J Am Soc Nephrol* 2010; 21: 419–427
- Kalantar-Zadeh K, Kopple JD. Relative contributions of nutrition and inflammation to clinical outcome in dialysis patients. *Am J Kidney Dis* 2001; 38: 1343–1350
- Stenvinkel P, Alvestrand A. Inflammation in end-stage renal disease: sources, consequences and therapy. *Semin Dial* 2002; 15: 329–337
- Guttridge DC, Mayo MW, Madrid LV *et al.* NF-kappaB-induced loss of MyoD messenger RNA: possible role in muscle decay and cachexia. *Science* 2000; 289: 2363–2366
- Kaizu Y, Ohkawa S, Odamaki M *et al.* Association between inflammatory mediators and muscle mass in long-term hemodialysis patients. *Am J Kidney Dis* 2003; 42: 295–302
- Storz P, Döppler H, Wernig A *et al.* TNF inhibits insulin induced STAT5 activation in differentiated mouse muscle cells pm128. *FEBS Lett* 1998; 440: 41–45
- Langen RC, Schols AM, Kelders MC *et al.* Inflammatory cytokines inhibit myogenic differentiation through activation of nuclear factor-kappaB. *FASEB J* 2001; 15: 1169–1180
- Zhang L, Du J, Hu Z *et al.* IL-6 and serum amyloid A synergy mediates angiotensin II-induced muscle wasting. *J Am Soc Nephrol* 2009; 20: 604–612



41. Cheung WW, Paik KH, Mak RH. Inflammation and cachexia in chronic kidney disease. *Pediatr Nephrol* 2010; 25: 711–724
42. Mitch WE, Du J, Bailey JL *et al.* Mechanisms causing muscle proteolysis in uremia: the influence of insulin and cytokines. *Miner Electrol Metab* 1999; 25: 216–219
43. Mitch WE, Goldberg AL. Mechanisms of muscle wasting: the role of the ubiquitin-proteasome pathway. *N Engl J Med* 1996; 335: 897–905
44. Du J, Wang X, Mierles C *et al.* Activation of caspase-3 is an initial step triggering accelerated muscle proteolysis in catabolic conditions. *J Clin Invest* 2004; 113: 115–123
45. Bailey JL, Zheng B, Hu Z *et al.* Chronic kidney disease causes defects in signaling through the insulin receptor substrate/phosphatidylinositol 3-kinase/Akt pathway: implications for muscle atrophy. *J Am Soc Nephrol* 2006; 17: 1388–1394
46. Boivin MA, Battah SI, Dominic EA. Activation of caspase-3 in the skeletal muscle during haemodialysis. *Eur J Clin Invest* 2010; 40: 903–910
47. Jeffrey A, Kurtz I. Metabolic acidosis of CKD: diagnosis, clinical characteristics, and treatment. *Am J Kidney Dis* 2005; 45: 978–993
48. Verove C, Maisonneuve N, El Azouzi A. Effect of the correction of metabolic acidosis on nutritional status in elderly patients with chronic renal failure. *J Ren Nutr* 2002; 12: 224–228
49. Caso G, Garlick PJ. Control of muscle protein kinetics by acid-base balance. *Curr Opin Clin Nutr Metab Care* 2005; 8: 73–76
50. Bailey JL, Wang X, England BK. The acidosis of chronic renal failure activates muscle proteolysis in rats by augmenting transcription of genes encoding proteins of the ATP-dependent Ubiquitin-proteasome pathway. *J Clin Invest* 1996; 97: 1447–1453
51. Mitch WE. Influence of metabolic acidosis on nutrition. *Am J Kidney Dis* 1997; 29: 16–18
52. Löfberg E, Wernerman J, Anderstam B *et al.* Correction of acidosis in dialysis patients increases branched chain and total essential amino acid levels in muscle. *Clin Nephrol* 1997; 48: 230–237
53. Stein A, Moorhouse J, Iles-Smith H *et al.* Role of an improvement in acid-base status and nutrition in CAPD patients. *Kidney Int* 1997; 52: 1089–1095
54. Pickering WP, Price SR, Bircher G *et al.* Nutrition in CAPD: serum bicarbonate and the ubiquitin-proteasome system in muscle. *Kidney Int* 2002; 61: 1286–1292
55. de Brito-Ashurst I, Varagunam M, Raftery MJ *et al.* Bicarbonate supplementation slows progression of CKD and improves nutritional status. *J Am Soc Nephrol* 2009; 20: 2075–2084
56. Graham KA, Reaich D, Channon SM. Correction of acidosis in CAPD decreases whole body protein degradation. *Kidney Int* 1996; 49: 1396–1400
57. Graham KA, Reaich D, Channon SM *et al.* Correction of acidosis in haemodialysis decreases whole body protein degradation. *J Am Soc Nephrol* 1997; 8: 632–637
58. Fouque D, Kalantar-Zadeh K, Kopple J *et al.* A proposed nomenclature and diagnostic criteria for protein-energy wasting in acute and chronic kidney disease Protein-energy wasting in kidney disease. *Kidney Int* 2008; 73: 391–398
59. Visser M, Deeg DJ, Lips P. Low vitamin D and high parathyroid hormone levels as determinants of loss of muscle strength and muscle mass (sarcopenia): the Longitudinal Aging Study Amsterdam. *J Clin Endocrinol Metab* 2003; 88: 5766–5772
60. Bischoff-Ferrari HA, Dietrich T, Orav EJ *et al.* Higher 25-hydroxyvitamin D concentrations are associated with better lower-extremity function in both active and inactive persons aged > or = 60 y. *Am J Clin Nutr* 2004; 80: 752–758
61. Snijder MB, van Schoor NM, Pluijm SM *et al.* Vitamin D status in relation to one-year risk of recurrent falling in older men and women. *J Clin Endocrinol Metab* 2006; 91: 2980–2985
62. Holick MF. Vitamin D deficiency. *N Engl J Med* 2007; 357: 266–281
63. Pfeifer M, Begerow B, Minne HW *et al.* Effects of a short-term vitamin D and calcium supplementation on body sway and secondary hyperparathyroidism in elderly women. *J Bone Miner Res* 2000; 15: 1113–1118
64. Sato Y, Iwamoto J, Kanoko T *et al.* Low-dose vitamin D prevents muscular atrophy and reduces falls and hip fractures in women after stroke: a randomized controlled trial. *Cerebrovasc Dis* 2005; 20: 187–192
65. Sorensen OH, Lund B, Saltin B *et al.* Myopathy in bone loss of ageing: improvement by treatment with 1 alpha-hydroxycholecalciferol and calcium. *Clin Sci* 1979; 56: 157–161
66. Bischoff HA, Borchers M, Gudat F. In situ detection of 1,25-dihydroxyvitamin D3 receptor in human skeletal muscle tissue. *Histochem J* 2001; 33: 19–24
67. Rodman JS, Baker T. Changes in the kinetics of muscle contraction in vitamin D depleted rats. *Kidney Int* 1978; 13: 189–193
68. Boland R. Role of vitamin D in skeletal muscle function. *Endocrinol Rev* 1986; 7: 434–448
69. Yoshikawa S, Nakamura T, Tanabe H *et al.* Osteomalacic myopathy. *Endocrinol Jpn* 1979; 26: 65–72
70. Song Y-H, Yangxin Li Y, Du J *et al.* Muscle-specific expression of IGF-1 blocks angiotensin II-induced skeletal muscle wasting. *J Clin Invest* 2005; 115: 451–458
71. Brink M, Wellen J, Delafontaine P. Angiotensin II causes weight loss and decreases circulating insulin-like growth factor I in rats through a pressor-independent mechanism. *J Clin Invest* 1996; 97: 2509–2516
72. Cohn RD, van Erp C, Habashi JP *et al.* Angiotensin II type 1 receptor blockade attenuates TGF- $\beta$ -induced failure of muscle regeneration in multiple myopathic states. *Nat Med* 2007; 13: 204–210
73. Carlson ME, Hsu M, Conboy IM. Imbalance between pSmad3 and Notch induces CDK inhibitors in old muscle stem cells. *Nature* 2008; 454: 528–532
74. Allen RE, Boxhorn LK. Regulation of skeletal muscle satellite cell proliferation and differentiation by transforming growth factor- $\beta$ , insulin-like growth factor I, and fibroblast growth factor. *J Cell Physiol* 1989; 138: 311–315
75. Li Y, Foster W, Deasy BM *et al.* Transforming growth factor- $\beta$ 1 induces the differentiation of myogenic cells into fibrotic cells in injured skeletal muscle: a key event in muscle fibrogenesis. *Am J Pathol* 2004; 164: 1007–1019
76. Bedair HS, Karthikeyan T, Quintero A *et al.* Angiotensin II receptor blockade administered after injury improves muscle regeneration and decreases fibrosis in normal skeletal muscle. *Am J Sports Med* 2008; 36: 1548–1554
77. Burks TN, Andres-Mateos E, Marx R *et al.* Losartan restores skeletal muscle remodeling and protects against disuse atrophy in sarcopenia. *Sci Transl Med* 2011; 3: 82ra37
78. Bellisle F, Dartois AM, Kleinknecht C *et al.* Alteration of the taste for sugar in renal insufficiency: study in the child. *Néphrologie* 1995; 16: 203–208
79. Hung KC, Wu CC, Chen HS *et al.* Serum IL-6, albumin and co-morbidities are closely correlated with symptoms of depression in patients on maintenance hemodialysis. *Nephrol Dial Transplant* 2010; 26: 658–664
80. Mak RH, Cheung W, Cone RD *et al.* Leptin and inflammation-associated cachexia in chronic kidney disease. *Kidney Int* 2006; 69: 794–797
81. Mak RH, Cheung W, Purnell J. Ghrelin in chronic kidney disease: too much or too little? *Perit Dial Int* 2007; 27: 51–55
82. Sarraf P, Frederich RC, Turner EM *et al.* Multiple cytokines and acute inflammation raise mouse leptin levels: potential role in inflammatory anorexia. *J Exp Med* 1997; 185: 171–175
83. Faggioni R, Feingold KR, Grunfeld C. Leptin regulation of the immune response and the immunodeficiency of malnutrition. *FASEB J* 2001; 15: 2565–2571
84. Sharma K, Considine RV. The Ob protein (leptin) and the kidney. *Kidney Int* 1998; 53: 1483–1487
85. Pérez-Fontán M, Cordido F, Rodríguez-Carmona A *et al.* Plasma ghrelin levels in patients undergoing haemodialysis and peritoneal dialysis. *Nephrol Dial Transplant* 2004; 19: 2095–2100
86. Iglesias P, Díez JJ, Fernández-Reyes JM *et al.* Serum ghrelin concentrations in patients with chronic renal failure undergoing dialysis. *Clin Endocrinol* 2006; 64: 68–73
87. Yoshimoto A, Mori K, Sugawara A *et al.* Associations between plasma ghrelin levels and body composition in end-stage renal disease: a longitudinal study. Plasma ghrelin and desacyl ghrelin concentration in renal failure. *J Am Soc Nephrol* 2002; 13: 2748–2752
88. Storer TW, Magliano L, Woodhouse L *et al.* Testosterone dose-dependently increases maximal voluntary strength and leg power, but does not

- affect fatigability or specific tension. *J Clin Endocrinol Metab* 2003; 88: 1478–1485
89. Carrero JJ, Qureshi AR, Nakashima A *et al.* Prevalence and clinical implications of testosterone deficiency in men with end-stage renal disease. *Nephrol Dial Transplant* 2011; 26: 184–190
  90. Bellinghieri G, Santoro D, Mallamace A *et al.* Sexual dysfunction in chronic renal failure. *J Nephrol* 2008; 13: S113–S117
  91. Dunkel L, Raivio T, Laine J *et al.* Circulating luteinizing hormone receptor inhibitor(s) in boys with chronic renal failure. *Kidney Int* 1997; 51: 777–784
  92. Phillips SK, Gopinathan J, Meehan K *et al.* Muscle strength changes during the menstrual cycle in adductor pollicis. *J Pathol* 1993; 496: 551–557
  93. Sarwar R, Beltran Nicos B, Rutherford OM. The effect of the menstrual cycle on human quadriceps strength, contractile properties and fatigability. Communication to the Physiology Society meeting, Brimingham, 1994
  94. Phillips SK, Rook KM, Siddle NC *et al.* Muscle weakness in women occurs at an earlier age than in men, but strength is preserved by hormone replacement therapy. *Clin Sci* 1993; 84: 95–98
  95. Silbiger S, Neugarten J. The impact of gender on the progression of chronic renal disease. *Am J Kidney Dis* 1995; 25: 515–533
  96. Neugarten J, Anjaliacharya J, Silbiger S. Effect of gender on the progression of nondiabetic renal disease: a meta-analysis. *J Am Soc Nephrol* 2000; 11: 319–329
  97. Lennie TA. Sex differences in severity of inflammation-induced anorexia and weight loss. *Biol Res Nurs* 1994; 5: 255–264
  98. Lu H, Lei X, Klaassen C. Gender differences in renal nuclear receptors and aryl hydrocarbon receptor in 5/6 nephrectomized rats. *Kidney Int* 2006; 70: 1920–1928
  99. Carrero JJ, Qureshi AR, Axelsson J *et al.* Comparison of nutritional and inflammatory markers in dialysis patients with reduced appetite. *Am J Clin Nutr* 2007; 85: 695–701
  100. Mahesh S, Kaskel F. Growth hormone axis in chronic kidney disease. *Pediatr Nephrol* 2008; 23: 41–48
  101. Rabkin R, Sun DF, Chen Y *et al.* Growth hormone resistance in uremia, a role for impaired JAK/STAT signaling. *Pediatr Nephrol* 2005; 20: 313–318
  102. Postel-Vinay MC, Tar A, Crosnier H *et al.* Plasma growth hormone-binding activity is low in uraemic children. *Pediatr Nephrol* 1991; 5: 545–547
  103. Ding H, Gao XL, Hirschberg R *et al.* Impaired actions of insulin-like growth factor 1 on protein synthesis and degradation in skeletal muscle of rats with chronic renal failure. Evidence for a postreceptor defect. *J Clin Invest* 1996; 97: 1064–1075
  104. Tonshoff B, Blum WF, Mehls O. Serum insulin-like growth factors and their binding proteins in children with end-stage renal disease. *Pediatr Nephrol* 1996; 10: 269–274
  105. Mehls O, Ritz E, Hunziker EB. Improvement of growth and food utilization by human recombinant growth hormone in uremia. *Kidney Int* 1988; 33: 45–52
  106. Ziegler TR, Lazarus JM, Young LS *et al.* Effects of recombinant human growth hormone in adults receiving maintenance hemodialysis. *J Am Soc Nephrol* 1991; 2: 1130–1135
  107. Hansen TB, Gram J, Jensen PB *et al.* Influence of growth hormone on whole body and regional soft tissue composition in adult patients on hemodialysis. A double-blind, randomized, placebo-controlled study. *Clin Nephrol* 2000; 53: 99–107
  108. Pupim LB, Flakoll PJ, Yu C *et al.* Recombinant human growth hormone improves muscle amino acid uptake and whole-body protein metabolism in chronic hemodialysis patients. *Am J Clin Nutr* 2005; 82: 1235–1243
  109. Garibotto G, Barreca A, Russo R *et al.* Effects of recombinant human growth hormone on muscle protein turnover in malnourished hemodialysis patients. *J Clin Invest* 1997; 99: 97–105
  110. Feldt-Rasmussen B, Lange M, Sulowicz W *et al.* Growth hormone treatment during hemodialysis in a randomized trial improves nutrition, quality of life, and cardiovascular risk. *J Am Soc Nephrol* 2007; 18: 2161–2171
  111. Fliser D, Pacini G, Engelleiter R *et al.* Insulin resistance and hyperinsulinemia are already present in patients with incipient renal disease. *Kidney Int* 1998; 53: 1343–1347
  112. Eidemak I, Feldt-Rasmussen B, Kanstrup IL *et al.* Insulin resistance and hyperinsulinemia in mild to moderate progressive chronic renal failure and its association with aerobic work capacity. *Diabetologia* 1995; 38: 565–572
  113. Kato Y, Hayashi M, Ohno Y *et al.* Mild renal dysfunction is associated with insulin resistance in chronic glomerulonephritis. *Clin Nephrol* 2000; 54: 366–373
  114. Kobayashi S, Maesato K, Moriya H *et al.* Insulin resistance in patients with chronic kidney disease. *Am J Kidney Dis* 2005; 45: 275–280
  115. Mak RH, DeFronzo RA. Glucose and insulin metabolism in uremia. *Nephron* 1992; 61: 377–382
  116. Alvestrand A. Carbohydrate and insulin metabolism in renal failure. *Kidney Int* 1997; 52: S48–S52
  117. Kautzky-Willer A, Pacini G, Barnas U *et al.* Intravenous calcitriol normalizes insulin sensitivity in uremic patients. *Kidney Int* 1995; 47: 200–206
  118. Spaia S, Pangelos M, Askepidis N *et al.* Effect of short-term rHuEPO treatment on insulin resistance in haemodialysis patients. *Nephron* 2000; 84: 320–325
  119. Thage O. Metabolic neuropathies and myopathies in adults. *Clinical aspects*. *Acta Neurol Scand* 1970; 46 (Suppl 43): 120–126
  120. Siew ED, Pupim LB, Majchrzak KM *et al.* Insulin resistance is associated with skeletal muscle protein breakdown in non-diabetic chronic hemodialysis patients. *Kidney Int* 2007; 71: 146–152
  121. Song YH, Li Y, Du J *et al.* Muscle-specific expression of IGF-1 blocks angiotensin II-induced skeletal muscle wasting. *J Clin Invest* 2005; 115: 451–458
  122. Grodstein GP, Blumenkrantz MJ, Kopple JD. Nutritional and metabolic response to catabolic stress in uremia. *Am J Clin Nutr* 1980; 33: 1411–1416
  123. Ikizler TA, Flakoll PJ, Parker RA *et al.* Amino acid and albumin losses during hemodialysis. *Kidney Int* 1994; 46: 830–837
  124. Kalantar-Zadeh K, Mehrotra R, Fouque D *et al.* Metabolic acidosis and malnutrition-inflammation complex syndrome in chronic renal failure. *Semin Dial* 2004; 17: 445–465
  125. Mak RH. Insulin resistance but IGF-I sensitivity in chronic renal failure. *Am J Physiol* 1996; 271: F114–F119
  126. Moyle GJ, Daar ES, Gertner JM *et al.* Growth hormone improves lean body mass, physical performance, and quality of life in subjects with HIV-associated weight loss or wasting on highly active antiretroviral therapy. *J Acquir Immune Defic Syndr* 2004; 35: 367–375
  127. Fouque D, Peng SC, Shamir E *et al.* Recombinant human insulin-like growth factor-1 induces an anabolic response in malnourished CAPD patients. *Kidney Int* 2000; 57: 646–654
  128. Sherwin RS, Bastl C, Finkelstein FO *et al.* Influence of uremia and hemodialysis on the turnover and metabolic effects of glucagon. *J Clin Invest* 1976; 57: 722–731
  129. Kopple JD, Cianciaruso B, Massry SG. Does parathyroid hormone cause protein wasting? *Contrib Nephrol* 1980; 20: 138–148
  130. Kaplan AA, Halley SE, Lapkin RA *et al.* Dialysate protein losses with bleach processed polysulphone dialyzers. *Kidney Int* 1995; 47: 573–578
  131. Wen CP, Wai JP, Tsai MK *et al.* Minimum amount of physical activity for reduced mortality and extended life expectancy: a prospective cohort study. *Lancet* 2011; 378: 1244
  132. Willis BL, Gao A, Leonard D *et al.* Midlife fitness and the development of chronic conditions in later life. *Arch Intern Med* 2012; 172: 1333–1340.8 1–8
  133. Andersen LB, Schnohr P, Schroll M *et al.* All-cause mortality associated with physical activity during leisure time, work, sports, and cycling to work. *Arch Intern Med* 2000; 160: 1621–1628
  134. Paffenbarger RS, Jr, Hyde RT, Wing AL *et al.* The association of changes in physical-activity level and other lifestyle characteristics with mortality among men. *N Engl J Med* 1993; 328: 538–545
  135. Johansen KL, Chertow GM, Ng AV *et al.* Physical activity levels in patients on hemodialysis and healthy sedentary controls. *Kidney Int* 2000; 57: 2564
  136. Painter P. Physical functioning in end-stage renal disease patients: update 2005. *Hemodial Int* 2005; 9: 218

137. Johansen KL, Shubert T, Doyle J *et al.* Muscle atrophy in patients receiving hemodialysis: effects on muscle strength, muscle quality and physical function. *Kidney Int* 2003; 63: 291–297
138. Castaneda C, Gordon PL, Uhlin KL *et al.* Resistance training to counteract the catabolism of a low-protein diet in patients with chronic renal insufficiency. A randomized, controlled trial. *Ann Intern Med* 2001; 135: 965–976
139. Adams GR, Vaziri ND. Skeletal muscle dysfunction in chronic renal failure: effects of exercise. *Am J Physiol Renal Physiol* 2006; 290: F753–F761
140. Cheema B, Abas H, Smith B *et al.* Progressive exercise for anabolism in kidney disease (PEAK): a randomized, controlled trial of resistance training during hemodialysis. *J Am Soc Nephrol* 2007; 18: 1594–1601
141. Davis TA, Karl IE, Goldberg AP *et al.* Effects of exercise training on muscle protein catabolism in uremia. *Kidney Int* 1983; 16: S52–S57
142. Zhang YE. Non-Smad pathways in TGF-beta signaling. *Cell Res* 2009; 19: 128–139
143. Yang W, Zhang Y, Li Y *et al.* Myostatin induces cyclin D1 degradation to cause cell cycle arrest through a phosphatidylinositol 3-kinase/AKT/GSK-3 beta pathway and is antagonized by insulin-like growth factor 1. *J Biol Chem* 2007; 282: 3799–3808
144. Cheung WW, Rosengren S, Boyle DL *et al.* Modulation of melanocortin signaling ameliorates uremic cachexia. *Kidney Int* 2008; 74: 180–186
145. Haidet AM, Rizo L, Handy C *et al.* Long-term enhancement of skeletal muscle mass and strength by single gene administration of myostatin inhibitors. *Proc Natl Acad Sci USA* 2008; 105: 4318–4322
146. Lee SJ, McPherron AC. Regulation of myostatin activity and muscle growth. *Proc Natl Acad Sci USA* 2001; 98: 9306–9311
147. Gilson H, Schakman O, Kalista S *et al.* Follistatin induces muscle hypertrophy through satellite cell proliferation and inhibition of both myostatin and activin. *Am J Physiol Endocrinol Metab* 2009; 297: E157–E164
148. Miyamoto T, Carrero JJ, Qureshi AR *et al.* Circulating follistatin in patients with chronic kidney disease: implications for muscle strength, bone mineral density, inflammation, and survival. *Clin J Am Soc Nephrol* 2011; 6: 1001–1008
149. Kalantar-Zadeh K, Abbott KC, Salahudeen AK *et al.* Survival advantages of obesity in dialysis patients. *Am J Clin Nutr* 2005; 81: 543–554
150. Kopple JD, Zhu X, Lew NL *et al.* Body weight-for-height relationships predict mortality in maintenance hemodialysis patients. *Kidney Int* 1999; 56: 1136–1148
151. Wolfe RA, Ashby VB, Daugirdas JT *et al.* Body size, dose of hemodialysis, and mortality. *Am J Kidney Dis* 2000; 35: 80–88
152. Leavey SF, McCullough K, Hecking E *et al.* Body mass index and mortality in 'healthier' as compared with 'sicker' haemodialysis patients: results from the Dialysis Outcomes and Practice Patterns Study (DOPPS). *Nephrol Dial Transplant* 2001; 16: 2386–2394
153. Port FK, Ashby VB, Dhingra RK, Roys EC, Wolfe RA *et al.* Dialysis dose and body mass index are strongly associated with survival in hemodialysis patients. *J Am Soc Nephrol* 2002; 13: 1061–1066
154. Lowrie EG, Li Z, Ofsthun N *et al.* Body size, dialysis dose and death risk relationships among hemodialysis patients. *Kidney Int* 2002; 62: 1891–1897
155. Johansen KL, Young B, Kaysen GA *et al.* Association of body size with outcomes among patients beginning dialysis. *Am J Clin Nutr* 2004; 80: 324–332
156. Leavey SF, Strawderman RL, Jones CA *et al.* Simple nutritional indicators as independent predictors of mortality in hemodialysis patients. *Am J Kidney Dis* 1998; 31: 997–1006
157. Degoulet P, Legrain M, Reach I *et al.* Mortality risk factors in patients treated by chronic hemodialysis. Report of the Diaphane collaborative study. *Nephron* 1982; 31: 103–110
158. Lowrie EG, Lew NL. Death risk in hemodialysis patients: the predictive value of commonly measured variables and an evaluation of death rate differences between facilities. *Am J Kidney Dis* 1990; 15: 458–482
159. Kalantar-Zadeh K, Block G, Horwich T *et al.* Reverse epidemiology of conventional cardiovascular risk factors in patients with chronic heart failure. *J Am Coll Cardiol* 2004; 43: 1439–1444
160. Stevens J, Cai J, Pamuk ER *et al.* The effect of age on the association between body-mass index and mortality. *N Engl J Med* 1998; 338: 1–7
161. Yeh S, Wu SY, Levine DM *et al.* Quality of life and stimulation of weight gain after treatment with megestrol acetate: correlation between cytokine levels and nutritional status, appetite in geriatric patients with wasting syndrome. *J Nutr Health Aging* 2000; 4: 246–251
162. Chlebowski RT, Grosvenor M, Lillington L *et al.* Dietary intake and counseling, weight maintenance, and the course of HIV infection. *J Am Diet Assoc* 1995; 95: 428–432. quiz 433–425
163. Kalantar-Zadeh K, Kuwae N, Wu DY *et al.* Associations of body fat and its changes over time with quality of life and prospective mortality in hemodialysis patients. *Am J Clin Nutr* 2006; 83: 202–210
164. Noori N, Kovesdy CP, Dukkupati R *et al.* Survival predictability of lean and fat mass in men and women undergoing maintenance hemodialysis. *Am J Clin Nutr* 2010; 92: 1060–1070
165. Noori N, Kopple JD, Kovesdy CP *et al.* Mid-arm muscle circumference and quality of life and survival in maintenance hemodialysis patients. *Clin J Am Soc Nephrol* 2010; 5: 2258–2268
166. Beddhu S, Pappas LM, Ramkumar N *et al.* Effects of body size and body composition on survival in hemodialysis patients. *J Am Soc Nephrol* 2003; 14: 2366–2372
167. Wolfe RR. The underappreciated role of muscle in health and disease. *Am J Clin Nutr* 2006; 84: 475–482
168. Sietsema KE, Amato A, Adler SG *et al.* Exercise capacity as a predictor of survival among ambulatory patients with end-stage renal disease. *Kidney Int* 2004; 65: 719–724

Received for publication: 3.10.2012; Accepted in revised form: 26.2.2013
